# Supplementary material for: Betulinic Acid Protects From Bone Loss in Ovariectomized Mice and Suppresses RANKL-Associated Osteoclastogenesis by Inhibiting the MAPK and NFATc1 Pathways
Source: PubMed Central journal article supplement (PMC7358641; doi:10.3389/fphar.2020.01025), 2020-07-07
Supplement: Image_1.pdf [file Image_1.pdf]

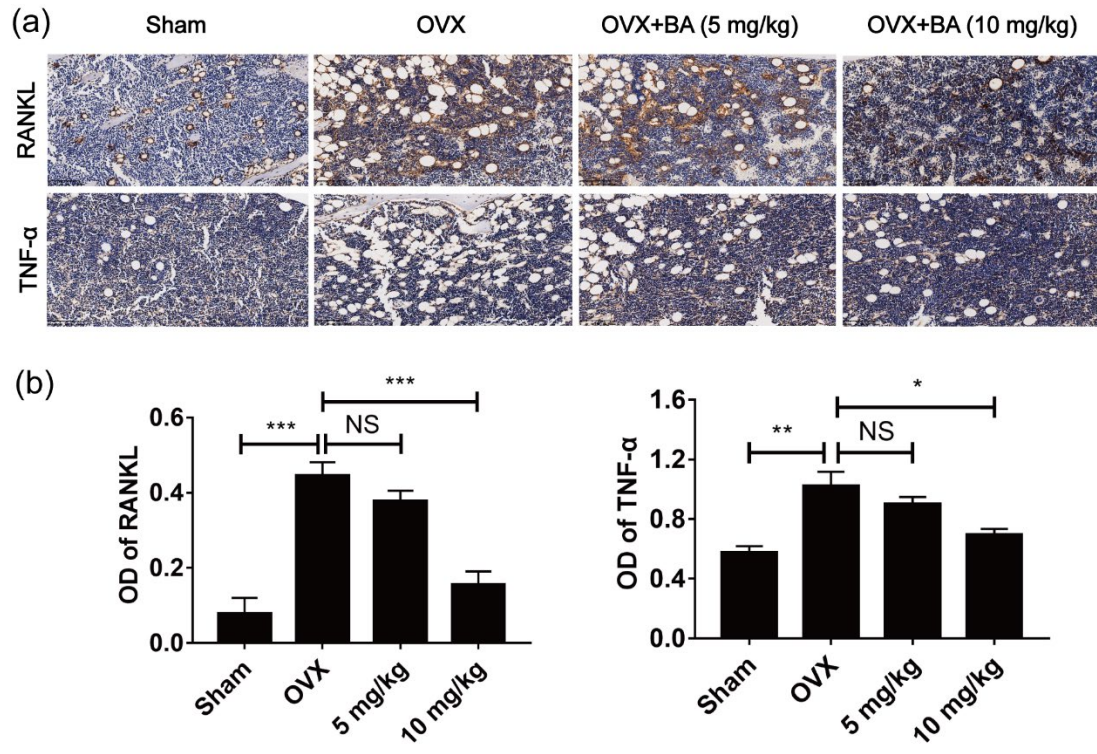

**Supplementary Figure 1. BA suppresses ovariectomized (OVX)-induced expression of RANKL and TNF- $\alpha$  ex vivo.**

(a) The expression of RANKL protein and TNF- $\alpha$  protein in tibial tissues in each group was detected by immunohistochemistry, and the expression of RANKL and TNF- $\alpha$  in the images were brown or russet. (b) Image Pro-Plus 6.0 was used to measure the optical density of immunohistochemical positive expression in samples (n=3). Data are mean $\pm$ SD. \*p<0.05, \*\*p<0.01, \*\*\*p<0.001 vs. OVX group. RANKL, receptor activator of nuclear factor- $\kappa$ B ligand; TNF- $\alpha$ , tumor necrosis factor alpha.
